# Supplementary material
Source: publisher site journal article supplement (https://www.spandidos-publications.com/5687/downloadSupplementary)

Figure S1. A schematic for pseudolaric acid B-induced apoptosis via mitochondrial apoptosis. ROS, reactive oxygen species.

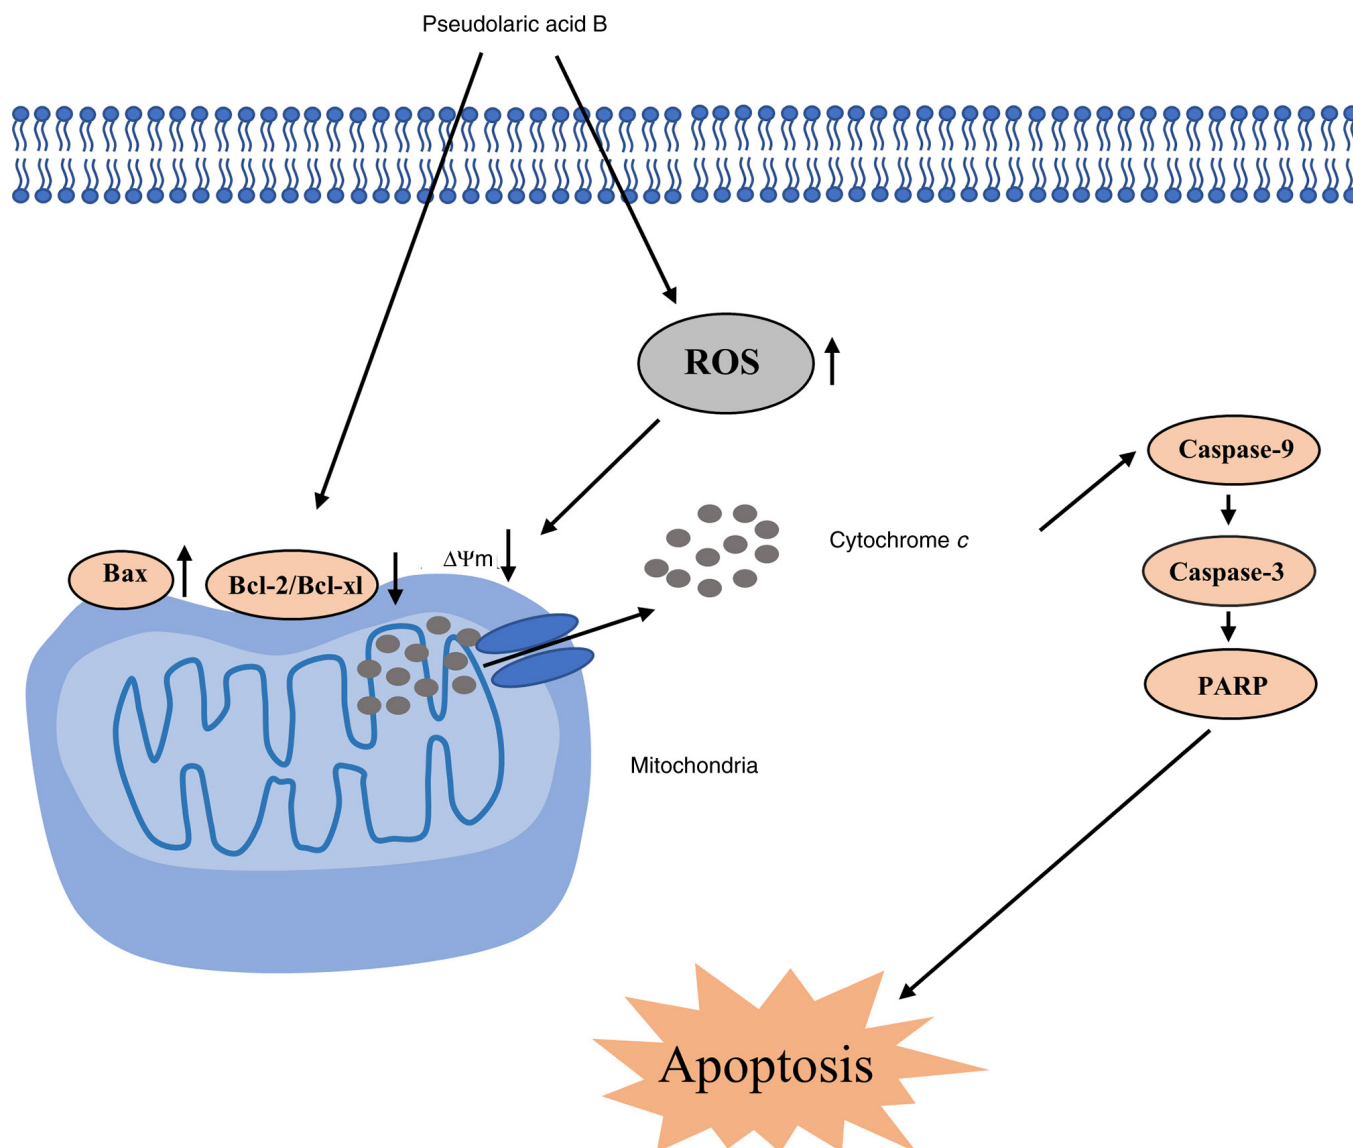

Supplement: Supplementary file 1 [file downloadSupplementary]
